# Supplementary material for: Maternal Epigenetic Regulation Contributes to Prevention of Estrogen Receptor–negative Mammary Cancer with Broccoli Sprout Consumption
Source: Oxford University Press journal article supplement (doi:10.1158/1940-6207.capr-19-0491), 2020-03-17
Supplement: 19406207capr190491-sup-231179_2_supp_6151097_q6zxn2.pdf [file 19406207capr190491-sup-231179_2_supp_6151097_q6zxn2.pdf]

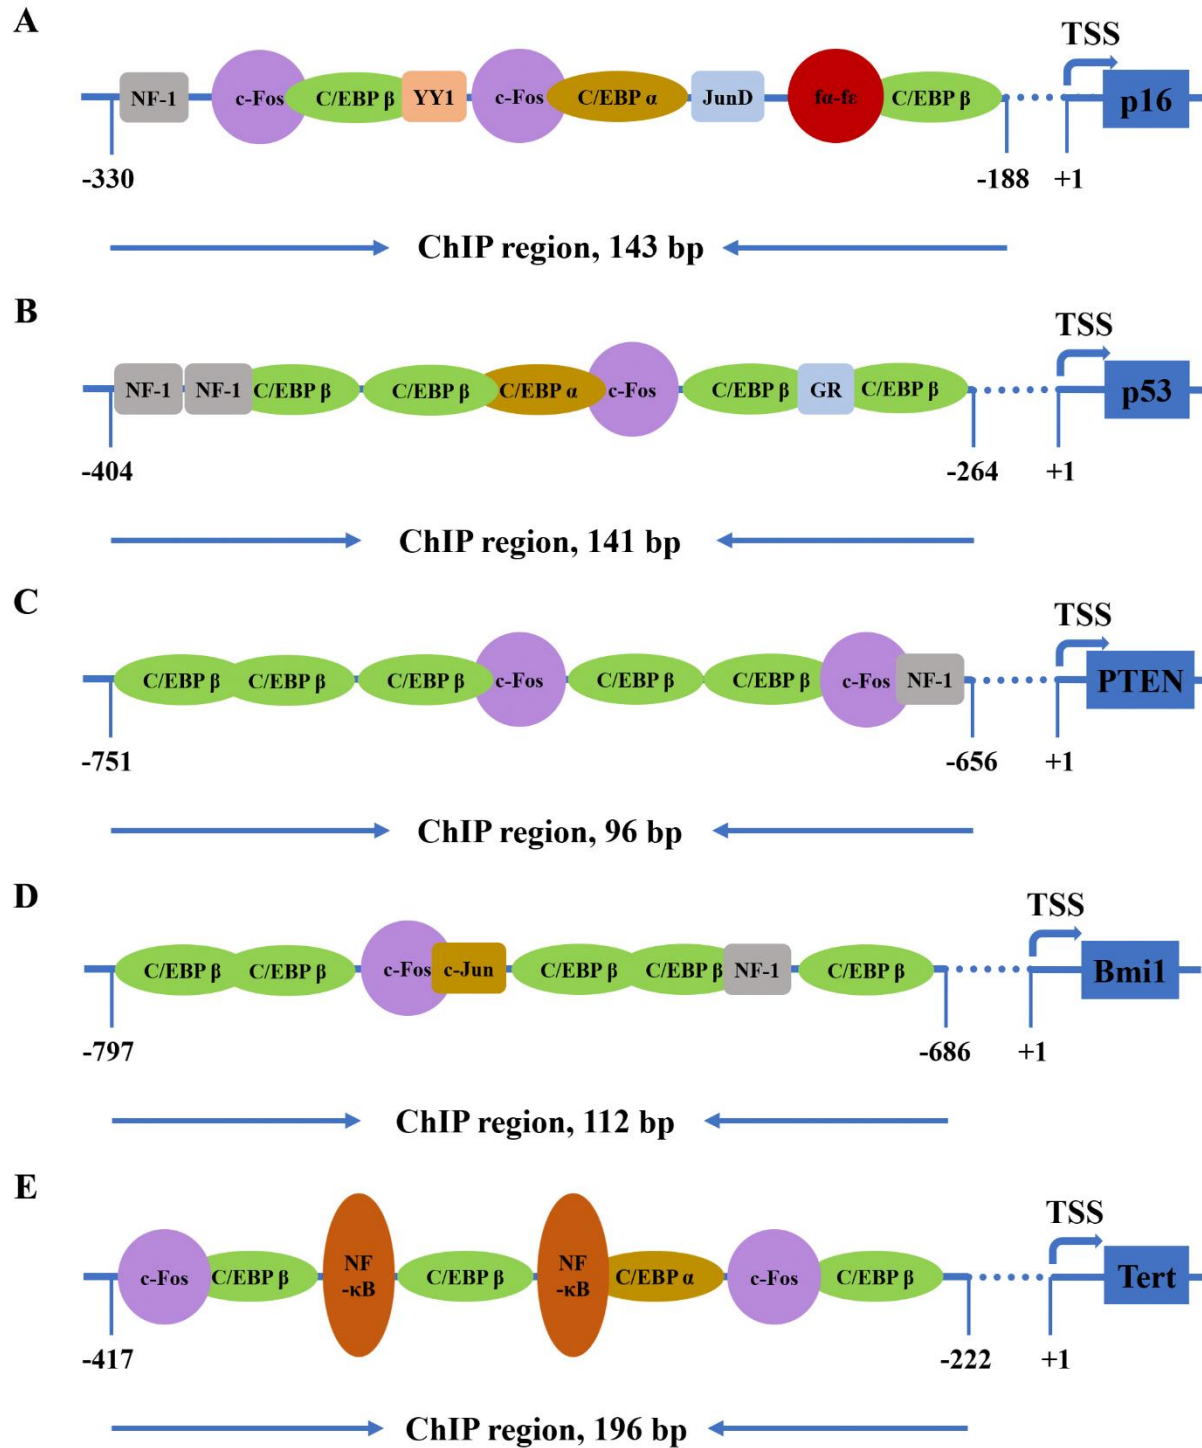

**Figure S2** The predicted transcription factor binding sites of amplified sequences in gene promoters of p16 (A), p53 (B), PTEN (C), Bmi1 (D) and Tert (E) in mouse tumor. Different shapes with different colors indicate different transcription factors; TSS: transcription start site.
